# Supplementary material
Source: PubMed Central journal article supplement (PMC6561472)
Supplement: NIHMS1028947-supplement-Supplemental_Figure-1.pdf [file NIHMS1028947-supplement-Supplemental_Figure-1.pdf]

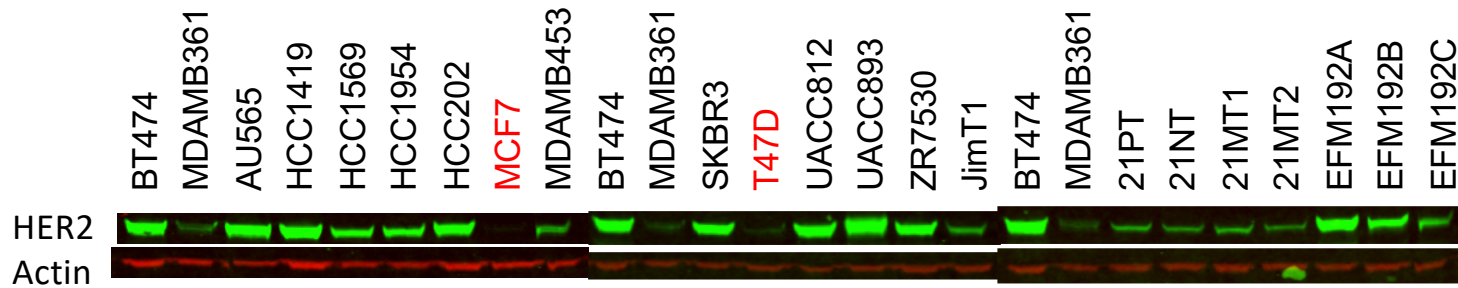

**Supplemental Figure 1.** Western analysis of HER-2 protein expression in HER-2 amplified human breast cancer cell lines. MCF7 and T47D are non HER-2 amplified and therefore serve as negative control.
