# Supplementary material
Source: PubMed Central journal article supplement (PMC6561472)
Supplement: NIHMS1028947-supplement-Supplemental_figure-2.pdf [file NIHMS1028947-supplement-Supplemental_figure-2.pdf]

**JIMT1 cells**

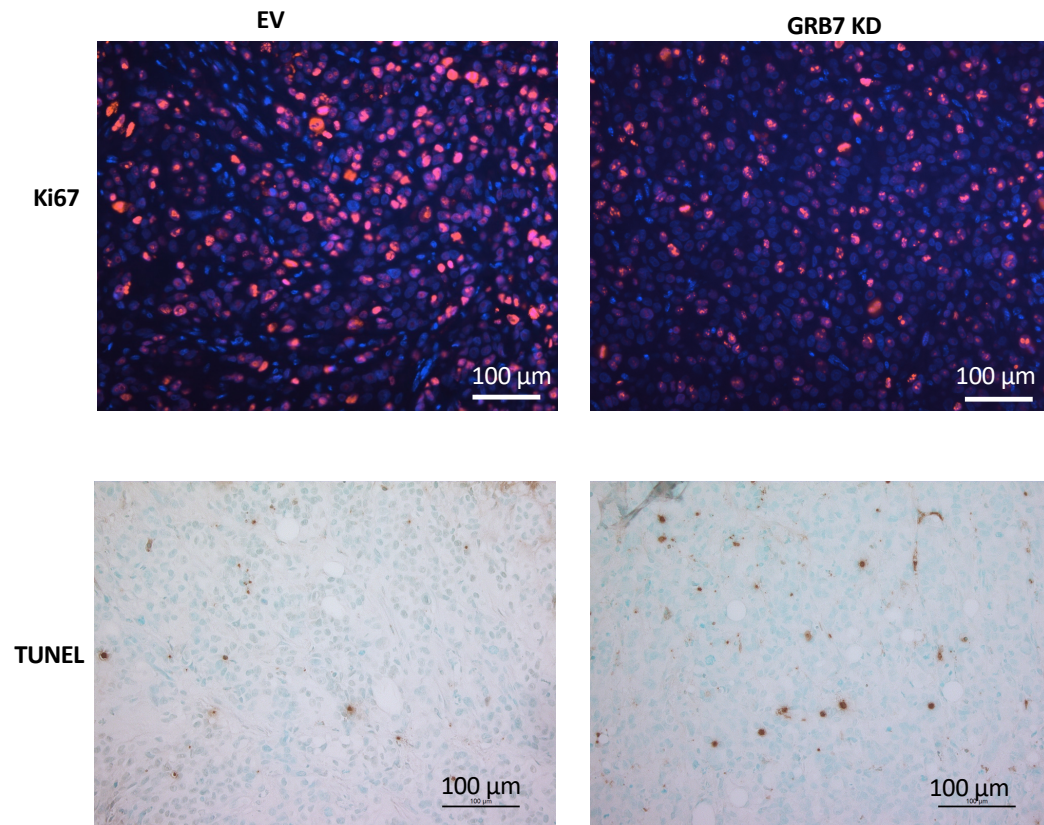

**Supplemental Figure 2A**

## HCC1954 Cells

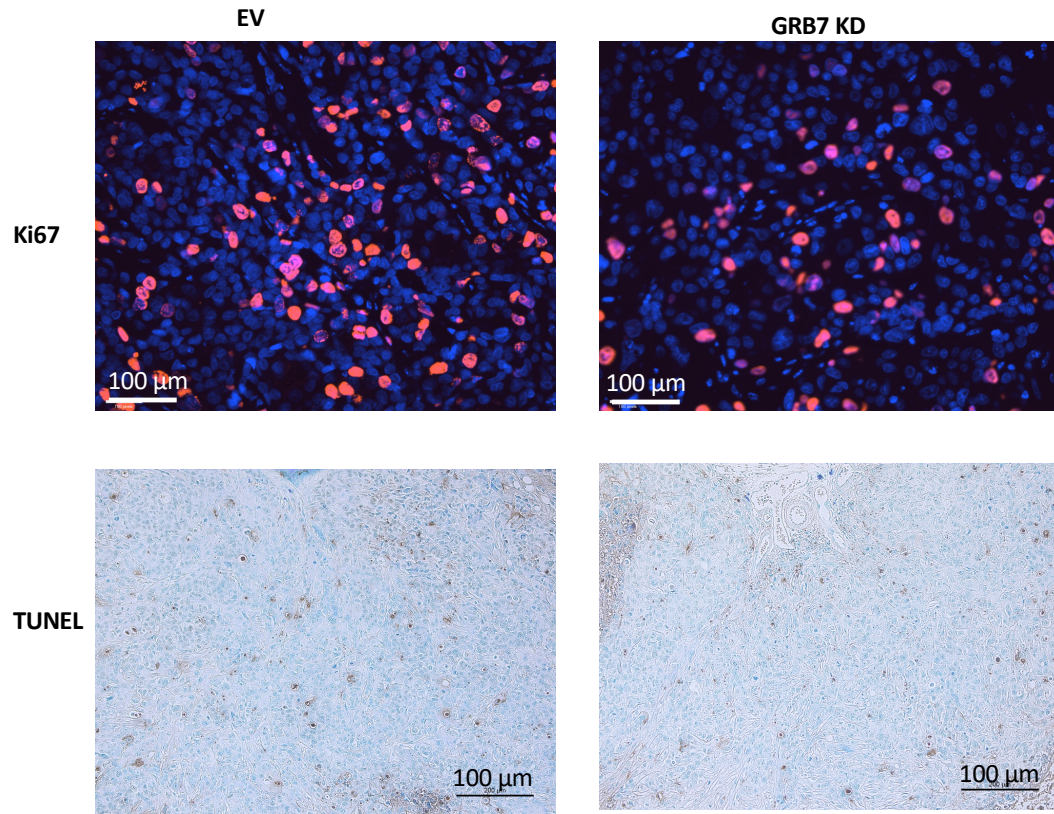

Supplemental Figure 2B

**21MT1 cells**

**EV**

**GRB7 KD**

**Ki67**

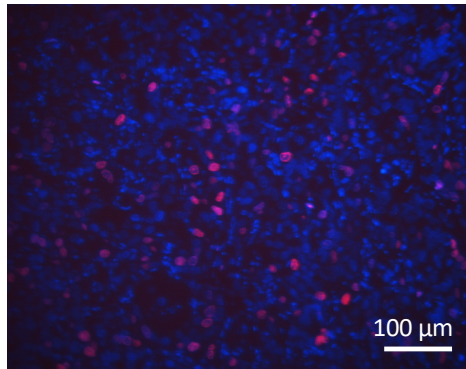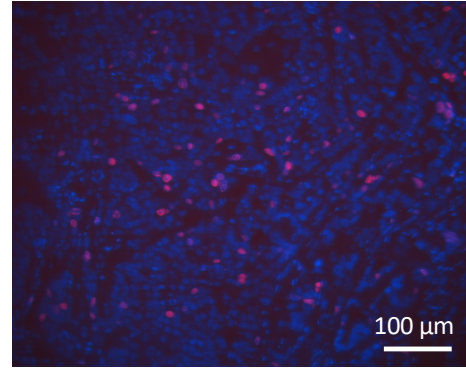

**TUNEL**

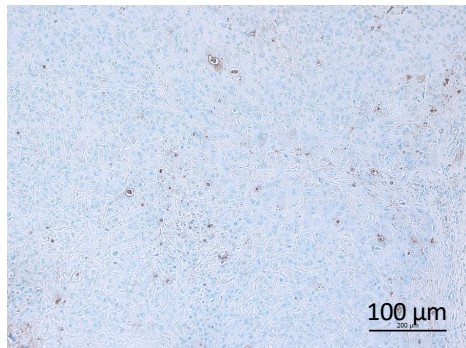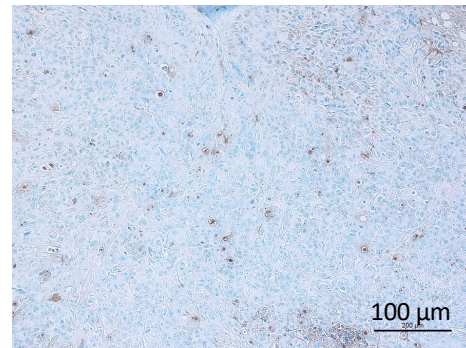

**Supplemental Figure 2C**
