# Supplementary material
Source: PubMed Central journal article supplement (PMC6561472)
Supplement: NIHMS1028947-supplement-Supplemental_figure-3.pdf [file NIHMS1028947-supplement-Supplemental_figure-3.pdf]

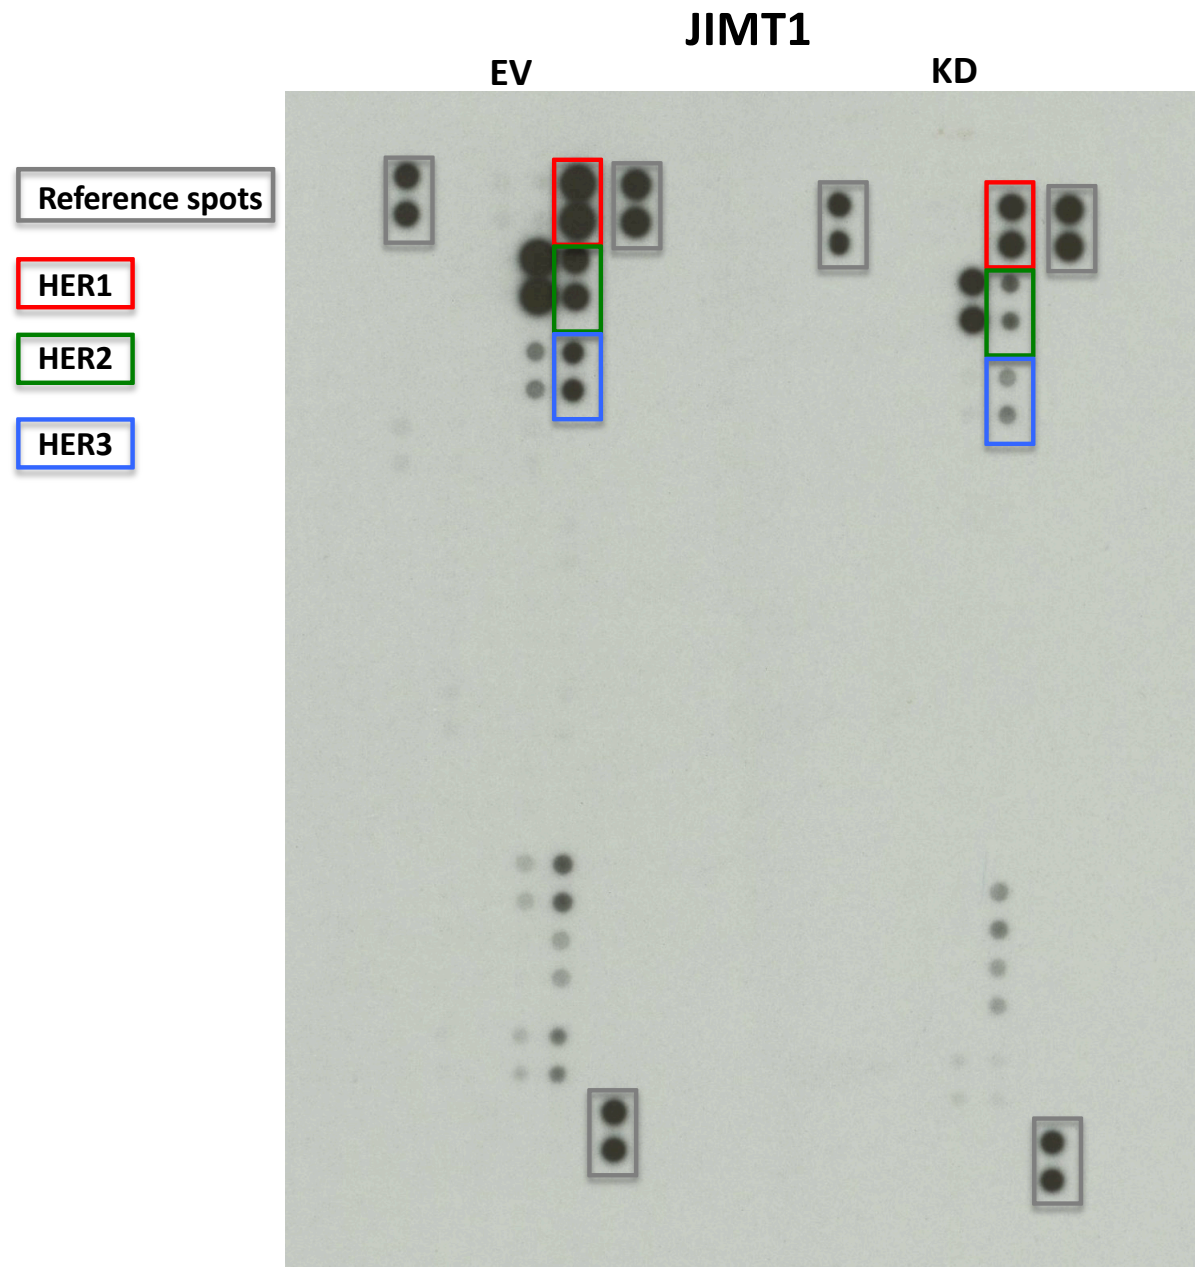

**Supplemental Figure 3. Phospho-proteome Profiling with R&D P-RTK Kit  
Decrease in HER-1 tyrosine phosphorylation with GRB7 KD**
